# Supplementary material for: A biochemometric approach for the assessment ofPhyllanthus emblicafemale fertility effects as determinedviaUPLC-ESI-qTOF-MS and GC-MS
Source: Royal Society of Chemistry journal article supplement (doi:10.1039/c9fo00767a), 2019-01-01
Supplement: c9fo00767a1.pdf [file c9fo00767a1.pdf]

## Supplementary Information

**Table S1:** Effect of the total ethanol extract of *P. emblica* fruit and its fractions on uterine weight, serum estradiol and vaginal cornification in immature ovariectomized female albino rats for estimation of estrogenic activity (n=6)

| Groups                                            | Uterine weight (g100g <sup>-1</sup> b.wt.) | % increase in uterine weight | Serum estradiol Pg mL <sup>-1</sup> | Vaginal cornification score* |
|---------------------------------------------------|--------------------------------------------|------------------------------|-------------------------------------|------------------------------|
| Vehicle (control)                                 | 0.05 ± 0.001                               | -                            | 3.3 ± 0.2                           | 0                            |
| Ethinyl estradiol (50 µg kg b.wt. <sup>-1</sup> ) | 0.2 ± 0.02**                               | 277                          | 17.6 ± 0.7**                        | 3                            |
| TE (250 mg/kg b.wt. <sup>-1</sup> )               | 0.09 ± 0.02                                | 73                           | 12.7 ± 0.2**                        | 2                            |
| PE fraction (250 mg/kg b.wt. <sup>-1</sup> )      | 0.23 ± 0.03**                              | 340                          | 21.7 ± 2.2**                        | 3                            |
| CH fraction (250 mg/kg b.wt. <sup>-1</sup> )      | 0.16 ± 0.14**                              | 211                          | 15.5 ± 1.2**                        | 3                            |
| EA fraction (250 mg/kg b.wt. <sup>-1</sup> )      | 0.07 ± 0.017                               | 42                           | 3.8 ± 0.2                           | 0                            |
| BU fraction (250 mg/kg b.wt. <sup>-1</sup> )      | 0.08 ± 0.021                               | 46                           | 4.2 ± 0.2                           | 1                            |

TE: Total ethanol extract; PE: Petroleum ether fraction; CH: Chloroform fraction; EA: Ethyl acetate fraction; BU: Butanol fraction

Data presented as means ± SD

\*\* Significant at  $p < 0.01$  as compared with negative control group

- Statistical analysis performed using one-way analysis of variance (ANOVA) accompanied by Costat computer program using Least Significant Difference (LSD) at  $p < 0.01$ .

### \*Vaginal cornification score

0 Diestrus smear, mainly leucocytes few nucleated epithelial cells

1 Mixture of leucocytes and nucleated epithelial cells.

2 Proestrus smear, mainly nucleated and some cornified cells may be present.

3 Estrus smear, cornified cells.

Animals showing a score of 2 or 3 are considered positive.

**Table S2:** Effect of total ethanolic extract of *P. emblica* fruit and its fractions on genitalia weight, count of follicular population at different stages and number of corpora lutea in immature female albino rats in experiment for estimation of gonadotropic activity (n=6)

| Groups                                       | FSH-like activity                              |                                |                              | LH-like activity                            |
|----------------------------------------------|------------------------------------------------|--------------------------------|------------------------------|---------------------------------------------|
|                                              | Genitalia weight (g 100g b.wt. <sup>-1</sup> ) | % increase in genitalia weight | Total follicles <sup>1</sup> | Number of corpora lutea (C.L.) <sup>1</sup> |
| Vehicle (control)                            | 0.13 ± 0.002                                   | -                              | 9.3 ± 0.5 <sup>g</sup>       | 2.66 ± 1.15 <sup>e</sup>                    |
| Positive control PMSG (1 IU)                 | 0.53 ± 0.2**                                   | 293                            | 17 ± 1 <sup>e</sup>          | 12 ± 2 <sup>d</sup>                         |
| Positive control hCG 1 IU                    |                                                |                                |                              |                                             |
| PMSG 5 IU                                    | 0.63 ± 0.2**                                   | 364                            | 18.3 ± 0.5 <sup>c,d</sup>    | 22 ± 1.3 <sup>c</sup>                       |
| hCG 5 IU                                     |                                                |                                |                              |                                             |
| PMSG 10 IU                                   | 0.68 ± 0.1**                                   | 400                            | 23.3 ± 0.5 <sup>b</sup>      | 27.3 ± 2.2 <sup>b</sup>                     |
| hCG 10 IU                                    |                                                |                                |                              |                                             |
| PMSG 20U                                     | 0.87 ± 0.06**                                  | 544                            | 26.3 ± 0.5 <sup>a</sup>      | 39 ± 1.2 <sup>a</sup>                       |
| hCG 20 IU                                    |                                                |                                |                              |                                             |
| TE (250 mg b.wt. <sup>-1</sup> )             | 0.18 ± 0.003                                   | 32                             | 12.5 ± 1.2 <sup>f</sup>      | 6 ± 2.3 <sup>e</sup>                        |
| PE fraction (250 mg kg b.wt. <sup>-1</sup> ) | 0.2 ± 0.05**                                   | 54                             | 17.3 ± 0.5 <sup>d,e</sup>    | 20 ± 2 <sup>c</sup>                         |
| CH fraction (250 mg kg b.wt. <sup>-1</sup> ) | 0.28 ± 0.1**                                   | 105                            | 26 ± 1 <sup>a</sup>          | 20.7 ± 3 <sup>c</sup>                       |
| EA fraction (250 mg kg b.wt. <sup>-1</sup> ) | 0.14 ± 0.03                                    | 5                              | 9.3 ± 0.5 <sup>g</sup>       | 3.3 ± 1.1 <sup>e</sup>                      |
| BU fraction (250 mg kg b.wt. <sup>-1</sup> ) | 0.22 ± 0.01**                                  | 63                             | 19.4 ± 1 <sup>c</sup>        | 30 ± 2 <sup>b</sup>                         |

TE: Total ethanol extract; PE: Petroleum ether fraction; CH: Chloroform fraction; EA: Ethyl acetate fraction; BU: Butanol fraction

PMSG: Pregnant mare serum gonadotropin, hCG: Human chorionic gonadotropin

Data presented as means ± SD

\*\* Significant at  $p < 0.05$  as compared with negative control group

Statistical analysis performed using one-way analysis of variance (ANOVA) accompanied by Costat computer program using least significant difference (LSD) at  $p < 0.05$

<sup>1</sup>Unshared superscript letters indicate values of significant difference between groups ( $p < 0.05$ )

Blue shaded cells denote doses of human chorionic gonadotropin (hCG) positive control for LH-like activity assay and their results

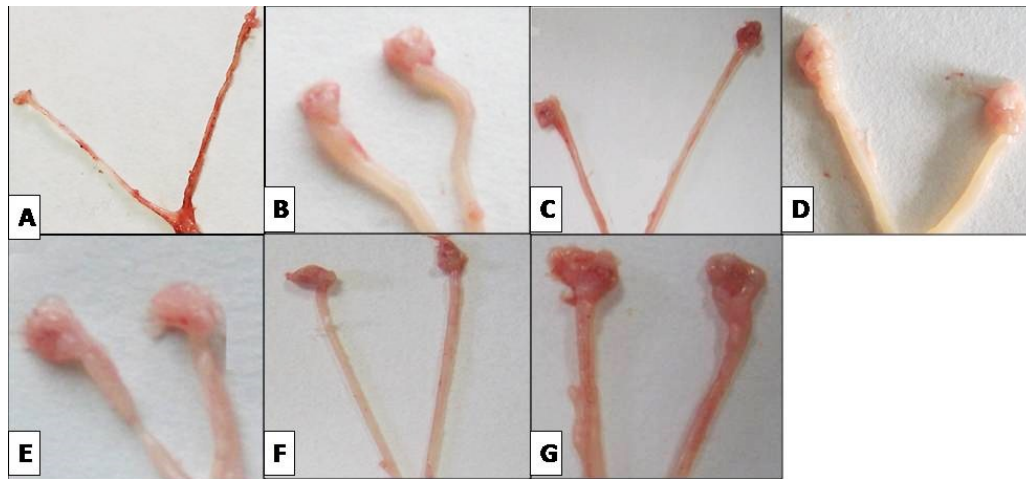

**Fig. S1.** Photographs of genitalia of immature female rats in experiment for estimation of FSH-like activity (x1.5).

**A:** Normal control group (vehicle) showing thin thread-like uterine horns with scanty amounts of uterine secretions; **B:** Positive control group (Pregnant mare's serum gonadotropin (PMSG); 5IU/rat) showing short uterine horns with thin membranes and filled with large amounts of uterine fluid; **C:** TE extract, 250 mg kg b.wt.<sup>-1</sup> showing thin, elongated uterine horns, filled with scanty amounts of uterine secretions; **D:** PE fraction, 250 mg kg b.wt.<sup>-1</sup> showing short uterine horns filled with uterine secretions; **E:** CH fraction, 250 mg kg b.wt.<sup>-1</sup> showing short uterine horns filled with large amounts of uterine fluids; **F:** EA fraction, 250 mg kg b.wt.<sup>-1</sup> showing thin thread-like uterine horns with scanty amounts of uterine secretions; **G:** BU-fraction, 250 mg kg b.wt.<sup>-1</sup> showing short uterine horns, engorged with uterine secretions.

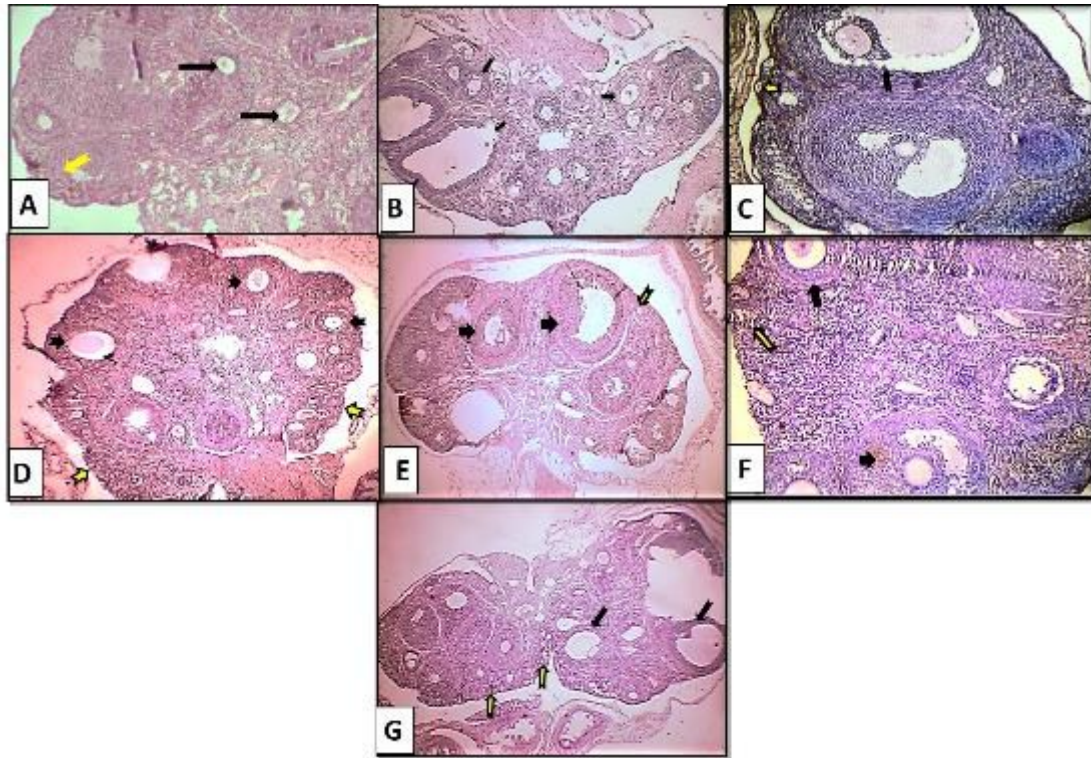

**Fig. S2.** Cross section in the ovaries of immature female rats in experiment for estimation of FSH-like activity (H&E, x40).

**A:** Normal control group (vehicle) showing normal follicular proliferation with moderate numbers of follicles in all stages; mature Graafian follicles, secondary follicles, and primordial follicles; **B:** Positive control group (Pregnant mare's serum gonadotropin (PMSG); 5IU/rat) showing enlarged ovaries with hyperactivity of follicular proliferation showing large numbers of follicles at different developmental stages mostly Graafian follicles and mature antral follicles; **C:** TE extract, 250 mg kg b.wt.<sup>-1</sup> showing few follicular maturation with few of follicles as mature antral follicles with moderate primordial follicles (x100); **D:** PE fraction, 250 mg kg b.wt.<sup>-1</sup> showing moderate follicular maturation with some follicles appearing as mature antral follicles, large numbers of primary and primordial follicles; **E:** CH fraction, 250 mg kg b.wt.<sup>-1</sup> showing good follicular proliferation, large numbers of Graafian follicles, few numbers of primary and primordial follicles; **F:** EA fraction, 250 mg kg b.wt.<sup>-1</sup> showing few follicular maturation with few follicles as mature antral follicles and few primordial follicles (x100); **G:** BU-fraction, 250 mg kg b.wt.<sup>-1</sup> showing good follicular activity with large numbers of mature Graafian follicles with few numbers of primary and primordial follicles present. Black arrow: mature follicles; yellow arrow: primordial follicles.



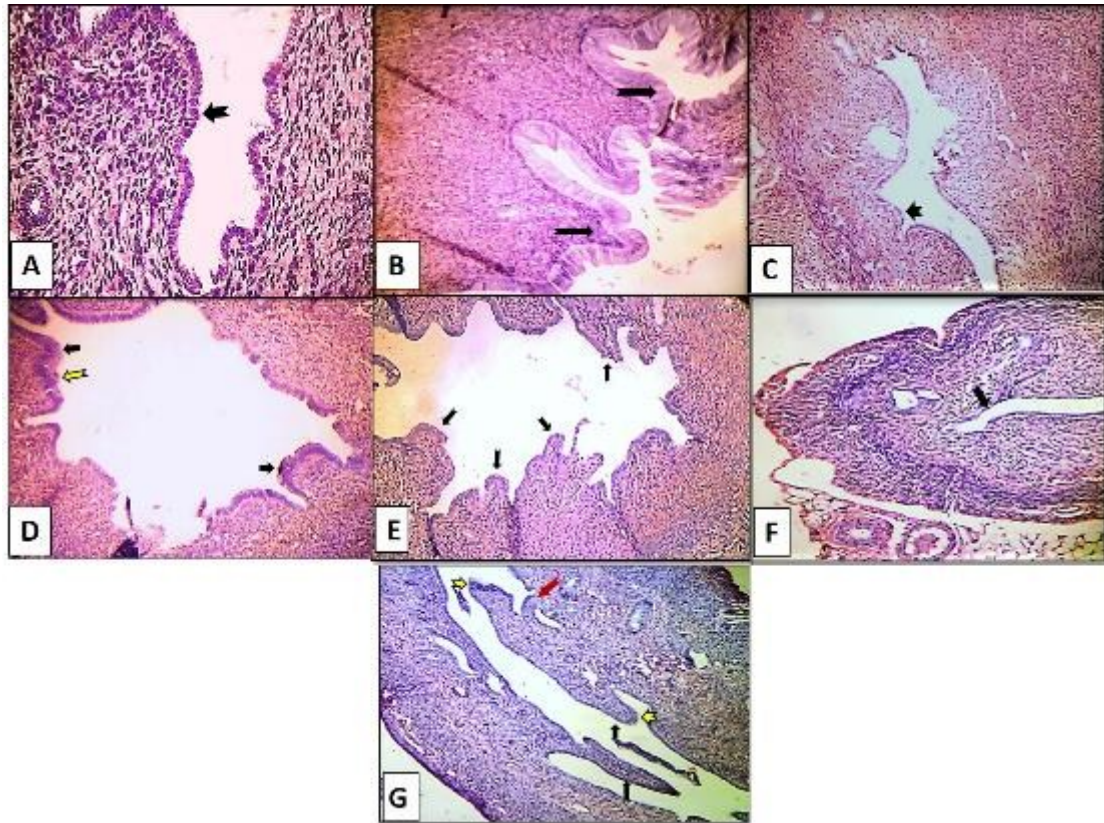

**Fig. S3.** Histological micrographs in the uteri of immature female rats in experiment for estimation of FSH-like activity (H&E, x100).

**A:** Normal control group (vehicle) showing normal uterine activity, the endometrium appeared normal with simple columnar epithelium and simple glandular activity (x200); **B:** Positive control group (Pregnant mare's serum gonadotropin (PMSG); 5IU/rat) showing progestational proliferative activity of uteri, with increase in the height of the lining epithelium and formation of villus like projections; **C:** TE extract, 250 mg kg b.wt.<sup>-1</sup> showing normal endometrial proliferation with normal height of lining epithelium and mild finger like projection (villus formation); **D:** PE fraction, 250 mg kg b.wt.<sup>-1</sup> showing moderate endometrial proliferation with normal height of lining epithelium, finger like projection accompanied by mild hyperplasia and normal uterine glands; **E:** CH fraction, 250 mg kg b.wt.<sup>-1</sup> showing moderate endometrial proliferation, with normal height of lining epithelium and finger like projections (x200); **F:** EA fraction, 250 mg kg b.wt.<sup>-1</sup> showing normal flattened endometrial mucosa with normal height of the lining epithelium, no obvious hyperplasia and normal appearance of uterine glands; **G:** BU-fraction, 250 mg kg b.wt.<sup>-1</sup> showing moderate endometrial proliferation, with normal thickening of endometrial epithelium and villus-like projections formation accompanied by mild hyperplasia and moderate glandular activity. Black arrow: endometrial epithelium.; yellow arrow: hyperplasia, red arrow: glandular activity.

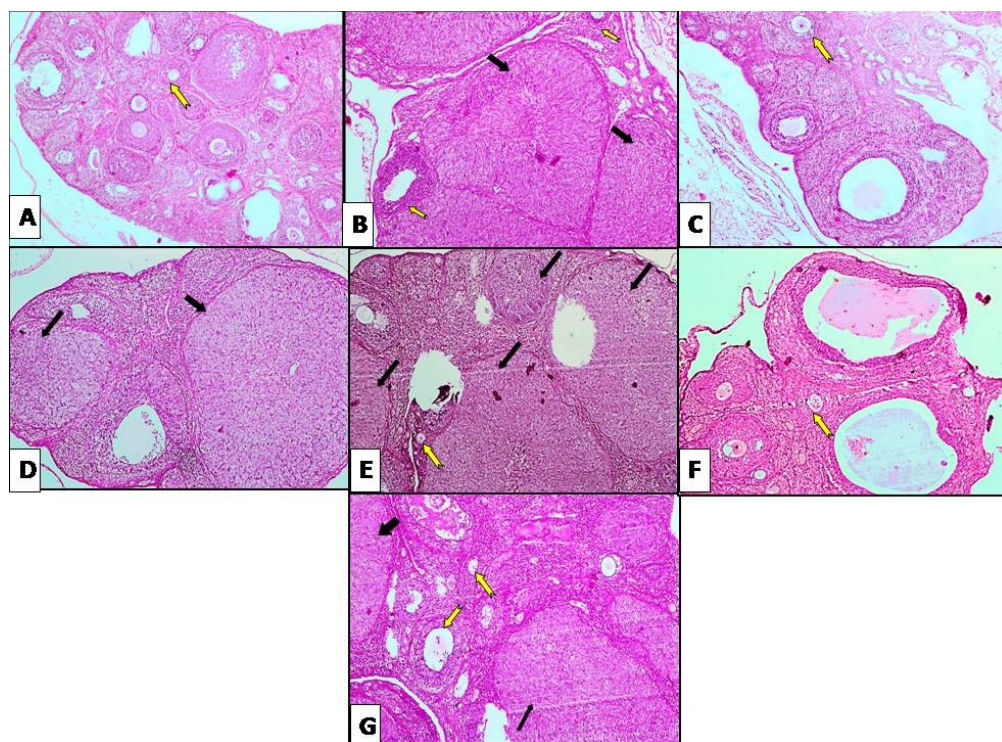

**Fig. S4.** Cross section in ovaries of immature female rats in experiment for estimation of LH-like activity (H&E, x40).

**A:** Normal control group (vehicle) showing moderate numbers of follicles in all stages; **B:** Positive control group (Human chorionic gonadotropin (hCG), 5 IU/rat) showed high luteinizing activity, *corpora lutea* appearing adjacent to each other with few compressed secondary follicles in between; **C:** TE extract, 250 mg kg b.wt.<sup>-1</sup> showing normal follicular activity with moderate numbers of mature follicles; **D:** PE fraction, 250 mg kg b.wt.<sup>-1</sup> showing high luteinizing activity; **E:** CH fraction, 250 mg kg b.wt.<sup>-1</sup> showing high luteinizing activity with multiple *corpora lutea* adjacent to each other; **F:** EA fraction, 250 mg kg b.wt.<sup>-1</sup> showing moderate follicular activity and low luteinizing activity; **G:** BU-fraction, 250 mg kg b.wt.<sup>-1</sup> showing luteinizing hyperactivity, large numbers of *corpora lutea* with few numbers of follicles in different stages. Black arrow: *corpora lutea*; yellow arrow: secondary follicles.



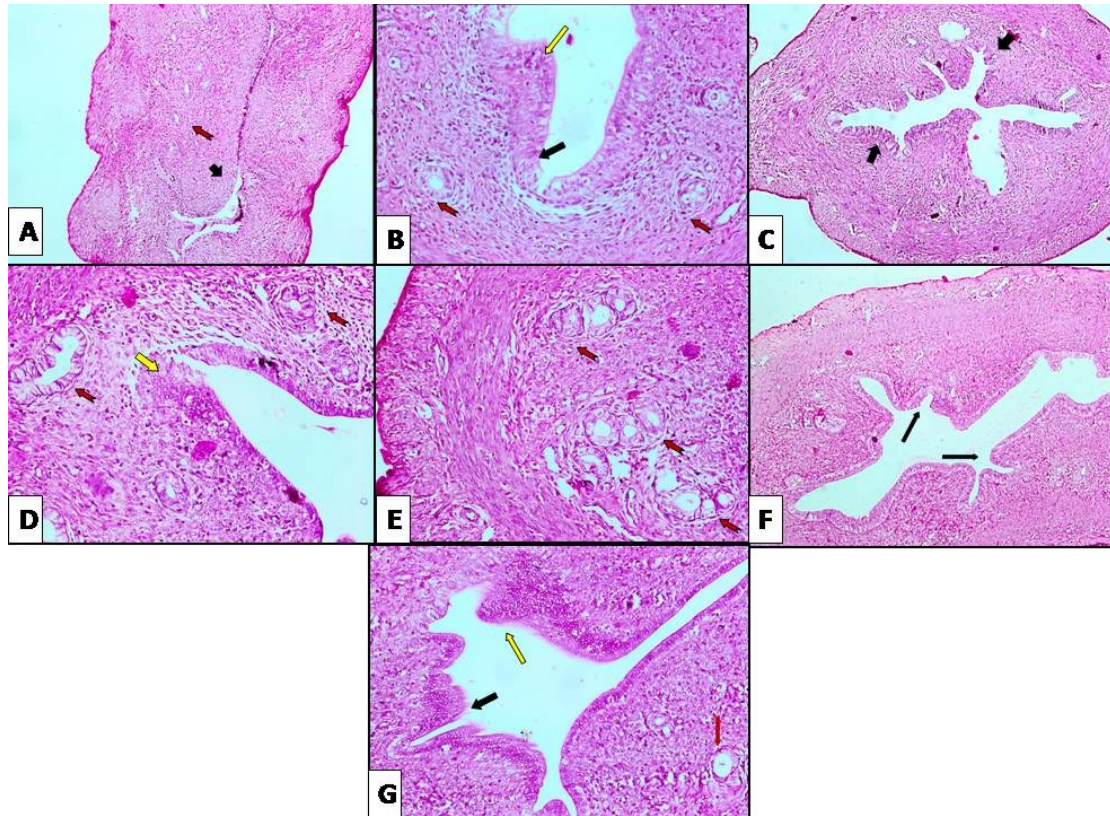

**Fig. S5.** Histological micrographs in the uteri of immature female rats in experiment for estimation of LH-like activity (H&E, x40).

**A:** Normal control group (vehicle) showing normal endometrial activity with mild folding and normal thickening of the endometrial lining epithelium with normal size and appearance of uterine glands; **B:** Positive control group (Human chorionic gonadotropin (hCG), 5 IU/rat) showing increase in the height of endometrial epithelium associated with multifocal hyperplasia of endometrial epithelium and good glandular activity (x100); **C:** TE extract, 250 mg kg b.wt.<sup>-1</sup> showing moderate folding in endometrium associated with increase the height of its lining epithelium and normal endometrial glands; **D:** PE fraction, 250 mg kg b.wt.<sup>-1</sup> showing focal hyperplasia in the lining epithelium of endometrium associated with moderate endometrial gland activity; **E:** CH fraction, 250 mg/kg showing hyperactivity of the uterine glands (coiled glands) (x100); **F:** EA fraction, 250 mg kg b.wt.<sup>-1</sup> showing mild papillary projection of endometrial epithelium (x100); **G:** BU-fraction, 250 mg kg b.wt.<sup>-1</sup> showing moderate multifocal hyperplasia with moderate folding in endometrial surface and good glandular activity. Black arrow: endometrial epithelium; yellow arrow: hyperplasia; red arrow: glandular activity.

**Table S3:** Metabolites annotated in *P. emblica* fruit total ethanol extract and its fractions via UPLC-qTOF-MS in positive and negative ionization modes.

| Peak No. | R <sub>t</sub> (min.) | Mol. ion <i>m/z</i> [-/+]                                    | Error (ppm) | Formula                                                      | MS/MS fragments              | Tentative Identification                                                 | Class                  | TE | BU | EA | CH | PE |
|----------|-----------------------|--------------------------------------------------------------|-------------|--------------------------------------------------------------|------------------------------|--------------------------------------------------------------------------|------------------------|----|----|----|----|----|
| 1        | 0.85                  | 179.0562 [M-H] <sup>-</sup>                                  | 6.621       | C <sub>6</sub> H <sub>11</sub> O <sub>6</sub> <sup>-</sup>   | 161                          | Hexose                                                                   | Sugar                  | -  | +  | -  | -  | -  |
| 2        | 0.92                  | 209.0302[M-H] <sup>-</sup>                                   | 4.862       | C <sub>6</sub> H <sub>9</sub> O <sub>8</sub> <sup>-</sup>    | 191, 173, 147, 125, 103, 85  | Mucic acid                                                               | Organic acid           | +  | +  | +  | -  | -  |
| 3        | 0.97                  | 331.0667 [M-H] <sup>-</sup>                                  | 2.045       | C <sub>13</sub> H <sub>15</sub> O <sub>10</sub> <sup>-</sup> | 313, 271, 211, 169, 151, 125 | Galloylhexose                                                            | Gallotannin            | +  | +  | -  | +  | +  |
| 4        | 1.04                  | 361.0412 [M-H] <sup>-</sup>                                  | 2.819       | C <sub>13</sub> H <sub>13</sub> O <sub>12</sub> <sup>-</sup> | 343, 317, 209, 191, 147      | Mucic acid gallate                                                       | Gallotannin            | +  | +  | -  | -  | -  |
| 5        | 1.06                  | 133.0143 [M-H] <sup>-</sup>                                  | 8.873       | C <sub>4</sub> H <sub>5</sub> O <sub>5</sub> <sup>-</sup>    | 115, 71                      | Malic acid                                                               | Organic acid           | -  | -  | -  | +  | -  |
| 6        | 1.31                  | 129.0194 [M-H] <sup>-</sup>                                  | 9.571       | C <sub>5</sub> H <sub>5</sub> O <sub>4</sub> <sup>-</sup>    | 85, 71                       | Methylene-succinic acid (itaconic acid)                                  | Organic acid           | -  | -  | -  | +  | -  |
| 7        | 1.32                  | 169.0143 [M-H] <sup>-</sup>                                  | 6.628       | C <sub>7</sub> H <sub>5</sub> O <sub>5</sub> <sup>-</sup>    | 125                          | Gallic acid                                                              | Gallic acid derivative | +  | -  | +  | -  | +  |
| 8        | 1.42                  | 375.0567 [M-H] <sup>-</sup>                                  | 2.474       | C <sub>14</sub> H <sub>15</sub> O <sub>12</sub> <sup>-</sup> | 343, 299, 223, 191           | Mucic acid methyl ester gallate                                          | Gallotannin            | +  | -  | -  | -  | -  |
| 9        | 1.46                  | 343.0303 [M-H] <sup>-</sup> /<br>345.0453 [M+H] <sup>+</sup> | 2.077       | C <sub>13</sub> H <sub>11</sub> O <sub>11</sub> <sup>-</sup> | 299, 191, 147, 129           | Mucic acid lactone gallate                                               | Gallotannin            | +  | +  | +  | -  | -  |
| 10       | 1.82                  | 389.0721 [M-H] <sup>-</sup>                                  | 1.613       | C <sub>15</sub> H <sub>17</sub> O <sub>12</sub> <sup>-</sup> | 357, 237, 191, 169           | Mucic acid dimethyl ester gallate                                        | Gallotannin            | +  | +  | +  | +  | -  |
| 11       | 2.05                  | 143.035 [M-H] <sup>-</sup>                                   | 7.584       | C <sub>6</sub> H <sub>7</sub> O <sub>4</sub> <sup>-</sup>    | 143, 125, 99, 71             | Methyl itaconate                                                         | Organic acid           | -  | -  | -  | +  | -  |
| 12       | 2.77                  | 483.0766 [M-H] <sup>-</sup>                                  | 0.748       | C <sub>20</sub> H <sub>19</sub> O <sub>14</sub> <sup>-</sup> | 331, 313, 271, 211, 169      | Digalloyl hexose                                                         | Gallotannin            | +  | +  | -  | -  | -  |
| 13       | 3.06                  | 321.0251 [M-H] <sup>-</sup>                                  | 2.934       | C <sub>14</sub> H <sub>9</sub> O <sub>9</sub> <sup>-</sup>   | 277, 169, 125                | Digallic acid                                                            | Gallic acid derivative | -  | -  | +  | -  | -  |
| 14       | 3.59                  | 183.0298 [M-H] <sup>-</sup>                                  | 5.301       | C <sub>8</sub> H <sub>7</sub> O <sub>5</sub> <sup>-</sup>    | 168, 151, 124                | Methyl gallate (gallicin)                                                | Gallic acid derivative | +  | -  | +  | +  | -  |
| 15       | 3.64                  | 265.0927 [M-H] <sup>-</sup>                                  | 3.569       | C <sub>10</sub> H <sub>17</sub> O <sub>8</sub> <sup>-</sup>  | 191, 173, 147                | Tetra- <i>O</i> -methyl galactarate (tetra- <i>O</i> -methyl mucic acid) | Organic acid           | -  | +  | -  | -  | -  |
| 16       | 4.21                  | 357.0457 [M-H] <sup>-</sup> /<br>359.0609 [M+H] <sup>+</sup> | 1.435       | C <sub>14</sub> H <sub>13</sub> O <sub>11</sub> <sup>-</sup> | 339, 325, 205, 169           | Mucic acid lactone methyl ester gallate                                  | Gallotannin            | +  | +  | +  | +  | -  |



| Peak No. | R <sub>t</sub> (min.) | Mol. ion <i>m/z</i> [-/+]                                    | Error (ppm) | Formula                                                      | MS/MS fragments                                          | Tentative Identification                                               | Class                  | TE | BU | EA | CH | PE |
|----------|-----------------------|--------------------------------------------------------------|-------------|--------------------------------------------------------------|----------------------------------------------------------|------------------------------------------------------------------------|------------------------|----|----|----|----|----|
| 17       | 6.95                  | 299.0409 [M-H] <sup>-</sup>                                  | 3.784       | C <sub>12</sub> H <sub>11</sub> O <sub>9</sub> <sup>-</sup>  | 281, 267, 255, 237, 223, 205, <b>169</b>                 | Trimethoxybenzene-tricarboxylic acid                                   | Phenolic compound      | +  | -  | +  | -  | -  |
| 18       | 8.57                  | 633.071 [M-H] <sup>-</sup>                                   | 1.99        | C <sub>27</sub> H <sub>21</sub> O <sub>18</sub>              | 463, <b>301</b> , 275                                    | Galloyl-hexahydroxydiphenyl-hexoside                                   | Ellagitannin           | +  | +  | +  | +  | -  |
| 19       | 9.24                  | 463.0507 [M-H] <sup>-</sup> /<br>465.0667 [M+H] <sup>+</sup> | 0.007       | C <sub>20</sub> H <sub>15</sub> O <sub>13</sub> <sup>-</sup> | 445, <b>301</b>                                          | Ellagic acid hexoside                                                  | Ellagitannin           | +  | +  | +  | -  | -  |
| 20       | 9.28                  | 783.07 [M+H] <sup>+</sup>                                    | 1.924       | C <sub>34</sub> H <sub>23</sub> O <sub>22</sub> <sup>+</sup> | 463, 337, <b>303</b> , 277                               | Emblicanin A                                                           | Ellagitannin           | +  | +  | +  | -  | -  |
| 21       | 9.35                  | 951.0709 [M-H] <sup>-</sup>                                  | 1.24        | C <sub>41</sub> H <sub>27</sub> O <sub>27</sub> <sup>-</sup> | <b>933</b> , 613, 301                                    | Geraniin                                                               | Ellagitannin           | +  | +  | -  | -  | -  |
| 22       | 9.61                  | 197.0454 [M-H] <sup>-</sup>                                  | 4.974       | C <sub>9</sub> H <sub>9</sub> O <sub>5</sub> <sup>-</sup>    | <b>169</b> , 153, 124                                    | Ethyl gallate (Phyllembin)                                             | Gallic acid derivative | -  | -  | -  | +  | -  |
| 23       | 9.64                  | 371.0619 [M-H] <sup>-</sup> /<br>373.0764 [M+H] <sup>+</sup> | 2.62        | C <sub>15</sub> H <sub>15</sub> O <sub>11</sub> <sup>-</sup> | 353, 327, 309, 281, 237, 219, <b>169</b> , 157, 125      | Di- <i>O</i> -methyl mucic acid lactone gallate                        | Gallotannin            | +  | +  | +  | +  | -  |
| 24       | 9.85                  | 617.08 [M+H] <sup>+</sup>                                    | 0.379       | C <sub>27</sub> H <sub>21</sub> O <sub>17</sub> <sup>+</sup> | 599, 303, <b>277</b>                                     | Phyllanemblinin A                                                      | Ellagitannin           | +  | -  | +  | -  | -  |
| 25       | 9.88                  | 785.0815 [M-H] <sup>-</sup>                                  | 0.864       | C <sub>34</sub> H <sub>25</sub> O <sub>22</sub> <sup>-</sup> | 741, <b>633</b> , 463, 301                               | Digalloyl-HHDP glucose                                                 | Ellagitannin           | +  | -  | +  | -  | -  |
| 26       | 10                    | 787.0982 [M-H] <sup>-</sup>                                  | 2.2         | C <sub>34</sub> H <sub>27</sub> O <sub>22</sub> <sup>-</sup> | 635, <b>617</b> , 483, 465, 313, 169                     | Tetragalloyl hexose                                                    | Gallotannin            | +  | +  | +  | -  | -  |
| 27       | 10.11                 | 417.1039 [M-H] <sup>-</sup>                                  | 2.631       | C <sub>17</sub> H <sub>21</sub> O <sub>12</sub> <sup>-</sup> | 399, 372, <b>265</b> , 191, 169                          | Tri- <i>O</i> -methyl mucic acid methyl ester gallate                  | Gallotannin            | +  | +  | +  | -  | -  |
| 28       | 10.26                 | 785.08 [M+H] <sup>+</sup>                                    | 1.792       | C <sub>34</sub> H <sub>25</sub> O <sub>22</sub> <sup>+</sup> | 483, 465, 321, <b>303</b> , 277                          | Pedunculagin                                                           | Ellagitannin           | +  | +  | +  | -  | -  |
| 29       | 10.28                 | 953.0874 [M-H] <sup>-</sup>                                  | 1.754       | C <sub>41</sub> H <sub>29</sub> O <sub>27</sub> <sup>-</sup> | 935, 909, 853, 801, 783, 633, 481, <b>476</b> , 463, 301 | Chebulagic acid                                                        | Ellagitannin           | +  | +  | +  | -  | -  |
| 30       | 10.41                 | 300.9985 [M-H] <sup>-</sup> /<br>303.01 [M+H] <sup>+</sup>   | 2.015       | C <sub>14</sub> H <sub>5</sub> O <sub>8</sub> <sup>-</sup>   | <b>301</b> , 283, 271, 257, 229, 185                     | Ellagic acid                                                           | Ellagitannin           | +  | +  | +  | +  | +  |
| 31       | 10.49                 | 313.0567 [M-H] <sup>-</sup> /<br>315.0714 [M+H] <sup>+</sup> | 4.126       | C <sub>13</sub> H <sub>13</sub> O <sub>9</sub> <sup>-</sup>  | 295, 267, 249, 223, <b>169</b> , 161, 143, 125           | Norbergenin                                                            | Gallic acid derivative | +  | +  | +  | +  | -  |
| 32       | 10.58                 | 431.1192 [M-H] <sup>-</sup>                                  | 1.919       | C <sub>18</sub> H <sub>23</sub> O <sub>12</sub> <sup>-</sup> | 413, <b>399</b> , 381, 357, 197, 169                     | Tri- <i>O</i> -methyl mucic acid- <i>O</i> -dimethoxy hydroxy benzoate | Gallotannin            | +  | +  | +  | -  | -  |
| 33       | 10.73                 | 399.0929 [M-H] <sup>-</sup>                                  | 1.684       | C <sub>17</sub> H <sub>19</sub> O <sub>11</sub> <sup>-</sup> | 381, 325, 281,                                           | Di- <i>O</i> -methyl mucic acid                                        | Gallotannin            | -  | +  | +  | -  | -  |

| Peak No. | R <sub>t</sub> (min.) | Mol. ion <i>m/z</i> [-/+]                                    | Error (ppm) | Formula                                                      | MS/MS fragments                                | Tentative Identification                                                                  | Class                  | TE | BU | EA | CH | PE |
|----------|-----------------------|--------------------------------------------------------------|-------------|--------------------------------------------------------------|------------------------------------------------|-------------------------------------------------------------------------------------------|------------------------|----|----|----|----|----|
|          |                       | /401.11 [M+H] <sup>+</sup>                                   |             |                                                              | 247, 185, <b>169</b>                           | lactone methyl ester- <i>O</i> -methoxy dihydroxybenzoate                                 |                        |    |    |    |    |    |
| 34       | 10.85                 | 415.12 [M+H] <sup>+</sup>                                    | 2.087       | C <sub>18</sub> H <sub>23</sub> O <sub>11</sub> <sup>+</sup> | 359, 313, 207, 171, <b>153</b>                 | Di- <i>O</i> -methyl mucic acid lactone methyl ester- <i>O</i> -dimethoxy hydroxybenzoate | Gallotannin            | -  | +  | +  | -  | -  |
| 35       | 11.08                 | 397.0774 [M-H] <sup>-</sup> /<br>399.09 [M+H] <sup>+</sup>   | 2.071       | C <sub>17</sub> H <sub>17</sub> O <sub>11</sub> <sup>-</sup> | <b>365</b> , 353, 333, 321, 289, 275           | Trimethyl ether chebulic acid                                                             | Ellagitannin           | -  | -  | -  | +  | -  |
| 36       | 11.06                 | 749.06 [M+H] <sup>+</sup>                                    | 1.946       | C <sub>34</sub> H <sub>21</sub> O <sub>20</sub> <sup>+</sup> | 731, 447, <b>303</b> , 277                     | Ellagitannin                                                                              | Ellagitannin           | +  | +  | +  | -  | -  |
| 37       | 11.09                 | 917.0685 [M-H] <sup>-</sup>                                  | 0.652       | C <sub>41</sub> H <sub>25</sub> O <sub>25</sub> <sup>-</sup> | 747, 458, <b>301</b> , 169                     | Mallotusin                                                                                | Ellagitannin           | +  | -  | +  | -  | -  |
| 38       | 11.17                 | 355.1033 [M-H] <sup>-</sup>                                  | 2.651       | C <sub>16</sub> H <sub>19</sub> O <sub>9</sub> <sup>-</sup>  | <b>309</b> , 207, 179, 147                     | Unknown                                                                                   | Unknown                | +  | -  | -  | -  | -  |
| 39       | 11.22                 | 335.0406 [M-H] <sup>-</sup> /<br>337.0554 [M+H] <sup>+</sup> | 2.572       | C <sub>15</sub> H <sub>11</sub> O <sub>9</sub> <sup>-</sup>  | <b>183</b> , 168, 124                          | Methyl digallate                                                                          | Gallic acid derivative | -  | -  | +  | +  | -  |
| 40       | 11.34                 | 303.05 [M+H] <sup>+</sup>                                    | 1.411       | C <sub>15</sub> H <sub>11</sub> O <sub>7</sub> <sup>+</sup>  | <b>285</b> , 275, 257, 247, 229, 165, 137      | Quercetin                                                                                 | Flavonoid              | +  | -  | -  | -  | -  |
| 41       | 11.41                 | 227.128 [M+H] <sup>+</sup>                                   | 0.9         | C <sub>12</sub> H <sub>19</sub> O <sub>4</sub> <sup>+</sup>  | 227, <b>209</b> , 191, 163                     | Tuberonic acid (hydroxy jasmonic acid)                                                    | Organic acid           | -  | -  | -  | +  | +  |
| 42       | 11.42                 | 445.1351 [M-H] <sup>-</sup>                                  | 2.286       | C <sub>19</sub> H <sub>25</sub> O <sub>12</sub> <sup>-</sup> | 427, <b>399</b> , 371, 355, 313, 283, 211, 169 | Tri- <i>O</i> -methyl mucic acid- <i>O</i> -trimethoxybenzoate                            | Gallotannin            | -  | +  | +  | -  | -  |
| 43       | 11.64                 | 569.1146 [M-H] <sup>-</sup>                                  | 1.492       | C <sub>24</sub> H <sub>25</sub> O <sub>16</sub> <sup>-</sup> | <b>417</b> , 265, 169                          | Di- <i>O</i> -methyl mucic acid di-methyl ester-di- <i>O</i> -gallate                     | Gallotannin            | -  | +  | +  | -  | -  |
| 44       | 11.75                 | 187.0975 [M-H] <sup>-</sup>                                  | 5.262       | C <sub>9</sub> H <sub>15</sub> O <sub>4</sub> <sup>-</sup>   | 169, 143, <b>125</b>                           | Azelaic acid                                                                              | Organic acid           | -  | -  | -  | -  | +  |
| 45       | 11.77                 | 429.14 [M+H] <sup>+</sup>                                    | 1.716       | C <sub>19</sub> H <sub>25</sub> O <sub>11</sub> <sup>+</sup> | 411, 373, 327, 185, <b>153</b>                 | Di- <i>O</i> -methyl mucic acid lactone methyl ester- <i>O</i> -trimethoxy benzoate       | Gallotannin            | -  | +  | +  | -  | -  |
| 46       | 12.19                 | 327.0725 [M-H] <sup>-</sup>                                  | 4.53        | C <sub>14</sub> H <sub>15</sub> O <sub>9</sub> <sup>-</sup>  | 295, 281, <b>169</b> , 125                     | Bergenin                                                                                  | Gallic acid derivative | -  | -  | +  | +  | -  |
| 47       | 12.39                 | 271.1186 [M-H] <sup>-</sup>                                  | 3.597       | C <sub>13</sub> H <sub>19</sub> O <sub>6</sub> <sup>-</sup>  | 253, 209, <b>191</b>                           | Unknown                                                                                   | Unknown                | -  | -  | -  | -  | +  |
| 48       | 13.08                 | 301.1281 [M+H] <sup>+</sup>                                  | 2.151       | C <sub>14</sub> H <sub>21</sub> O <sub>7</sub> <sup>+</sup>  | 283, <b>253</b> , 235                          | Unknown                                                                                   | Unknown                | +  | -  | -  | -  | -  |

| Peak No. | R <sub>t</sub> (min.) | Mol. ion <i>m/z</i> [-/+]                                | Error (ppm) | Formula                                                       | MS/MS fragments                                     | Tentative Identification                                                       | Class                  | TE | BU | EA | CH | PE |
|----------|-----------------------|----------------------------------------------------------|-------------|---------------------------------------------------------------|-----------------------------------------------------|--------------------------------------------------------------------------------|------------------------|----|----|----|----|----|
| 49       | 13.09                 | 911.1709 [M+H] <sup>+</sup>                              | 0.189       | C <sub>40</sub> H <sub>31</sub> O <sub>25</sub> <sup>+</sup>  | 457, <b>153</b>                                     | Tri- <i>O</i> -galloyl-4- <i>O</i> -brevifolincarboxyl-β- <i>D</i> -glucose    | Gallotannin            | -  | +  | +  | -  | -  |
| 50       | 13.1                  | 473.1654 [M-H] <sup>-</sup>                              | 0.121       | C <sub>21</sub> H <sub>29</sub> O <sub>12</sub> <sup>-</sup>  | 455, <b>399</b> , 381, 211, 169                     | Tri- <i>O</i> -methyl mucic acid di-methyl ester- <i>O</i> -trimethoxybenzoate | Gallotannin            | -  | +  | +  | -  | -  |
| 51       | 13.11                 | 341.0875 [M-H] <sup>-</sup>                              | 2.379       | C <sub>15</sub> H <sub>17</sub> O <sub>9</sub> <sup>-</sup>   | 295, <b>169</b> , 125                               | Methyl bergenin                                                                | Gallic acid derivative | -  | -  | +  | +  | -  |
| 52       | 13.33                 | 269.103 [M-H] <sup>-</sup>                               | 3.736       | C <sub>13</sub> H <sub>17</sub> O <sub>6</sub> <sup>-</sup>   | 251, 223, <b>207</b> , 195, 179                     | Unknown                                                                        | Unknown                | -  | -  | -  | -  | +  |
| 53       | 13.5                  | 287.0555 [M+H] <sup>+</sup>                              | 0.08        | C <sub>15</sub> H <sub>11</sub> O <sub>6</sub> <sup>+</sup>   | 269, 258, 241, 231, 213, <b>165</b> , 153, 133, 121 | Kaempferol                                                                     | Flavonoid              | -  | -  | +  | -  | -  |
| 54       | 13.52                 | 325.2277 [M+H] <sup>+</sup>                              | 1.84        | C <sub>21</sub> H <sub>29</sub> N <sub>2</sub> O <sup>+</sup> | 307, <b>233</b>                                     | Unknown nitrogenous compound                                                   | Unknown                | +  | -  | -  | +  | +  |
| 55       | 13.8                  | 327.2177 [M-H] <sup>-</sup>                              | 3.482       | C <sub>18</sub> H <sub>31</sub> O <sub>5</sub> <sup>-</sup>   | 309, <b>291</b> , 269, 251, 211, 183, 171           | Trihydroxy octadecadienoic acid                                                | Fatty acid             | -  | -  | -  | -  | +  |
| 56       | 13.85                 | 241.105 [M+H] <sup>+</sup>                               | 10.653      | C <sub>12</sub> H <sub>17</sub> O <sub>5</sub> <sup>+</sup>   | 223, 213, 185, 171                                  | Gallate derivative                                                             | Gallic acid derivative | +  | +  | +  | -  | -  |
| 57       | 14                    | 441.1391 [M+H] <sup>+</sup>                              | 1.397       | C <sub>20</sub> H <sub>25</sub> O <sub>11</sub> <sup>+</sup>  | 423, 409, <b>367</b> , 353, 335, 307                | Tri-methyl ether, tri-methyl ester Chebulic acid                               | Ellagitannin           | -  | -  | +  | -  | -  |
| 58       | 14.02                 | 226.1804 [M+H] <sup>+</sup>                              | 1.521       | C <sub>13</sub> H <sub>24</sub> NO <sub>2</sub> <sup>+</sup>  | <b>208</b> , 173, 163                               | Unknown                                                                        | Unknown                | +  | -  | -  | -  | -  |
| 59       | 14.05                 | 247.1337 [M+H] <sup>+</sup>                              | 3.233       | C <sub>15</sub> H <sub>19</sub> O <sub>3</sub> <sup>+</sup>   | 219, 201, <b>173</b>                                | Epoxyguaia-dien-olide                                                          | Sesquiterpene          | -  | -  | -  | +  | +  |
| 60       | 14.12                 | 355.1035 [M-H] <sup>-</sup>                              | 3.271       | C <sub>16</sub> H <sub>19</sub> O <sub>9</sub> <sup>-</sup>   | 323, 311, 281, 237, <b>169</b>                      | Gallate derivative                                                             | Gallic acid derivative | -  | -  | +  | -  | -  |
| 61       | 14.16                 | 329.2334 [M-H] <sup>-</sup>                              | 3.582       | C <sub>18</sub> H <sub>33</sub> O <sub>5</sub> <sup>-</sup>   | 311, 293, 249, <b>229</b> , 211, 171                | Trihydroxy octadeca-enoic acid                                                 | Fatty acid             | -  | -  | -  | -  | +  |
| 62       | 14.17                 | 257.0822 [M-H] <sup>-</sup>                              | 5.347       | C <sub>15</sub> H <sub>13</sub> O <sub>4</sub> <sup>-</sup>   | <b>213</b> , 151, 107                               | Methoxy - (phenyl methoxy) benzoic acid                                        | Phenolic compound      | -  | -  | -  | +  | -  |
| 63       | 14.44                 | 205.0871 [M-H] <sup>-</sup>                              | 5.945       | C <sub>12</sub> H <sub>13</sub> O <sub>3</sub> <sup>-</sup>   | 187, <b>161</b>                                     | Unknown                                                                        | Unknown                | -  | -  | -  | -  | +  |
| 64       | 14.78                 | 369.119 [M-H] <sup>-</sup> / 371.1339 [M+H] <sup>+</sup> | 2.659       | C <sub>17</sub> H <sub>21</sub> O <sub>9</sub> <sup>-</sup>   | 325, 295, 169                                       | Gallate derivative                                                             | Gallic acid derivative | -  | -  | +  | -  | -  |
| 65       | 15.65                 | 451.2317 [M+H] <sup>+</sup>                              | 2.115       | C <sub>24</sub> H <sub>35</sub> O <sub>8</sub> <sup>+</sup>   | 379, 313, 285, 227, <b>209</b>                      | Unknown                                                                        | Unknown                | -  | -  | -  | -  | +  |

| Peak No. | R <sub>t</sub> (min.) | Mol. ion m/z [-/+]          | Error (ppm) | Formula                                                        | MS/MS fragments         | Tentative Identification                                                                         | Class        | TE | BU | EA | CH | PE |
|----------|-----------------------|-----------------------------|-------------|----------------------------------------------------------------|-------------------------|--------------------------------------------------------------------------------------------------|--------------|----|----|----|----|----|
| 66       | 16                    | 311.2227 [M-H] <sup>-</sup> | 3.226       | C <sub>18</sub> H <sub>31</sub> O <sub>4</sub> <sup>-</sup>    | 293, 275, 201           | Dihydroxy octadeca-dienoic acid                                                                  | Fatty acid   | -  | -  | -  | +  | +  |
| 67       | 16.53                 | 313.2381 [M-H] <sup>-</sup> | 2.535       | C <sub>18</sub> H <sub>33</sub> O <sub>4</sub> <sup>-</sup>    | 295, 277, 267, 183      | Dihydroxy octadecenoic acid                                                                      | Fatty acid   | -  | -  | -  | -  | +  |
| 68       | 17.12                 | 476.2767 [M+H] <sup>+</sup> | 2.129       | C <sub>23</sub> H <sub>43</sub> NO <sub>7</sub> P <sup>+</sup> | 458,335, 261            | Lysophosphatidylethanol-amine (18:3)                                                             | Phospholipid | +  | -  | +  | -  | -  |
| 69       | 17.14                 | 595.2886 [M-H] <sup>-</sup> | 4.5         | C <sub>27</sub> H <sub>48</sub> O <sub>12</sub> P <sup>-</sup> | 415, 315, 279, 241      | Hydroxy[(hydroxy([penta hydroxycyclohexyl]oxy) phosphoryl)oxy]propyl-octadecadienoate LPI (18:2) | Phospholipid | -  | -  | -  | +  | -  |
| 70       | 17.32                 | 518.3241 [M+H] <sup>+</sup> | 1.088       | C <sub>26</sub> H <sub>49</sub> NO <sub>7</sub> P <sup>+</sup> | 500, 258, 184           | Linolenoyl-lysophosphatidylcholine (18:3) LYSO-PC                                                | Phospholipid | +  | -  | +  | +  | -  |
| 71       | 17.34                 | 293.2123 [M-H] <sup>-</sup> | 4.054       | C <sub>18</sub> H <sub>29</sub> O <sub>3</sub> <sup>-</sup>    | 275, 265, 249           | Hydroxy-octadecatrienoic acid                                                                    | Fatty acid   | -  | -  | -  | -  | +  |
| 72       | 17.4                  | 315.2538 [M-H] <sup>-</sup> | 2.74        | C <sub>18</sub> H <sub>35</sub> O <sub>4</sub> <sup>-</sup>    | 297, 279, 253           | Dihydroxy octadecanoic acid                                                                      | Fatty acid   | -  | -  | -  | -  | +  |
| 73       | 17.59                 | 571.2883 [M-H] <sup>-</sup> | 2.5         | C <sub>25</sub> H <sub>48</sub> O <sub>12</sub> P <sup>-</sup> | 409, 391, 315, 255, 241 | Hydroxy[(hydroxy ([pentahydroxycyclohexyl] oxy) phosphoryl) oxy] propyl palmitate LPI (16:0)     | Phospholipid | -  | -  | -  | +  | -  |
| 74       | 17.6                  | 291.1964 [M-H] <sup>-</sup> | 3.224       | C <sub>18</sub> H <sub>27</sub> O <sub>3</sub> <sup>-</sup>    | 273, 247, 219           | Oxo-octadecatrienoic acid                                                                        | Fatty acid   | -  | -  | -  | -  | +  |
| 75       | 17.83                 | 478.2929 [M+H] <sup>+</sup> | 1.012       | C <sub>23</sub> H <sub>45</sub> NO <sub>7</sub> P <sup>+</sup> | 460, 337, 263           | Lysophosphatidylethanolamine (18:2)                                                              | Phospholipid | +  | -  | +  | +  | -  |
| 76       | 17.96                 | 301.216 [M+H] <sup>+</sup>  | 0.587       | C <sub>20</sub> H <sub>29</sub> O <sub>2</sub> <sup>+</sup>    | 283, 273, 259           | Hydroxyabieta-trien-one                                                                          | Diterpene    | -  | -  | -  | -  | +  |
| 77       | 18.04                 | 295.2278 [M-H] <sup>-</sup> | 3.315       | C <sub>18</sub> H <sub>31</sub> O <sub>3</sub> <sup>-</sup>    | 277, 267, 251           | Hydroxyoctadecadienoic acid                                                                      | Fatty acid   | -  | -  | -  | -  | +  |
| 78       | 18.08                 | 520.3401 [M+H] <sup>+</sup> | 0.316       | C <sub>26</sub> H <sub>51</sub> NO <sub>7</sub> P <sup>+</sup> | 502, 258, 184           | Lysophosphatidylcholine (18:2) LYSO-PC                                                           | Phospholipid | +  | -  | +  | +  | -  |
| 79       | 18.3                  | 293.2122 [M-H] <sup>-</sup> | 3.546       | C <sub>18</sub> H <sub>29</sub> O <sub>3</sub> <sup>-</sup>    | 275, 249, 221           | Oxo-octadecadienoic acid                                                                         | Fatty acid   | -  | -  | -  | -  | +  |
| 80       | 18.35                 | 454.2928 [M+H] <sup>+</sup> | 1.33        | C <sub>21</sub> H <sub>45</sub> NO <sub>7</sub> P <sup>+</sup> | 436, 313                | Lysophosphatidyl ethanolamine (16:0)                                                             | Phospholipid | -  | -  | +  | +  | -  |



| Peak No. | R <sub>t</sub> (min.) | Mol. ion <i>m/z</i> [-/+]   | Error (ppm) | Formula                                                        | MS/MS fragments                             | Tentative Identification               | Class          | TE | BU | EA | CH | PE |
|----------|-----------------------|-----------------------------|-------------|----------------------------------------------------------------|---------------------------------------------|----------------------------------------|----------------|----|----|----|----|----|
| 81       | 18.57                 | 385.2372 [M+H] <sup>+</sup> | 0.327       | C <sub>24</sub> H <sub>33</sub> O <sub>4</sub> <sup>+</sup>    | 367, 349, 321, 255, 193, 175                | Cinnamoyl epoxy guaiandiol             | Sesquiterpene  | -  | -  | -  | +  | +  |
| 82       | 18.67                 | 496.3 [M+H] <sup>+</sup>    | 1.076       | C <sub>24</sub> H <sub>51</sub> NO <sub>7</sub> P <sup>+</sup> | 478, 258, 184                               | Lysophosphatidylcholine (16:0) LYSO-PC | Phospholipid   | -  | -  | +  | +  | -  |
| 83       | 18.8                  | 279.1591 [M+H] <sup>+</sup> | 1.949       | C <sub>16</sub> H <sub>23</sub> O <sub>4</sub> <sup>+</sup>    | 205, 149                                    | Dibutyl phthalate                      | Phthalate      | +  | -  | +  | +  | +  |
| 84       | 19.05                 | 522.3553 [M+H] <sup>+</sup> | 1.176       | C <sub>26</sub> H <sub>53</sub> NO <sub>7</sub> P <sup>+</sup> | 504, 258, 184                               | Lysophosphatidylcholine (18:1) LYSO-PC | Phospholipids  | +  | -  | +  | +  | -  |
| 85       | 19.51                 | 353.2682 [M+H] <sup>+</sup> | 1.348       | C <sub>21</sub> H <sub>37</sub> O <sub>4</sub> <sup>+</sup>    | 335, 261                                    | Octadecatrienoylglycerol               | Mono glyceride | +  | -  | +  | +  | +  |
| 86       | 19.83                 | 293.2469 [M+H] <sup>+</sup> | 2.001       | C <sub>19</sub> H <sub>33</sub> O <sub>2</sub> <sup>+</sup>    | 261, 243, 237, 223, 179, 165, 151           | Methyl octadeca-trienoate              | Fatty acid     | -  | -  | -  | +  | +  |
| 87       | 20.4                  | 524.3472 [M+H] <sup>+</sup> | 1.098       | C <sub>26</sub> H <sub>55</sub> NO <sub>7</sub> P <sup>+</sup> | 506, 258, 184                               | Lysophosphatidylcholine (18:0) LYSO-PC | Phospholipid   | -  | -  | +  | +  | -  |
| 88       | 20.77                 | 311.2578 [M+H] <sup>+</sup> | 0.744       | C <sub>19</sub> H <sub>35</sub> O <sub>3</sub> <sup>+</sup>    | 293, 279, 261, 243, 219, 183                | Methyl-hydroxy-octadecadienoate        | Fatty acid     | -  | -  | +  | +  | +  |
| 89       | 21.07                 | 282.2788 [M+H] <sup>+</sup> | 1.841       | C <sub>18</sub> H <sub>36</sub> NO <sup>+</sup>                | 265, 247                                    | Octadecenamide (oleamide)              | Amide          | -  | -  | -  | +  | +  |
| 90       | 21.42                 | 513.3574 [M+H] <sup>+</sup> | 0.061       | C <sub>32</sub> H <sub>49</sub> O <sub>5</sub> <sup>+</sup>    | 495, 471, 453, 435, 407, 307, 233, 219, 173 | Acetoxy-oxo-olean-enoic acid           | Triterpene     | -  | -  | -  | +  | +  |
| 91       | 22.41                 | 307.2627                    | 1.389       | C <sub>20</sub> H <sub>35</sub> O <sub>2</sub> <sup>+</sup>    | 289, 261, 243, 137                          | Labdane triterpene                     | Triterpene     | -  | -  | -  | +  | +  |
| 92       | 22.67                 | 441.3721 [M+H] <sup>+</sup> | 1.376       | C <sub>30</sub> H <sub>49</sub> O <sub>2</sub> <sup>+</sup>    | 423, 405, 287, 233, 215, 189                | Hydroxy olean-ene-one (oxo-β-amyrin)   | Triterpene     | -  | -  | -  | -  | +  |
| 93       | 22.82                 | 439.3565 [M+H] <sup>+</sup> | 1.177       | C <sub>30</sub> H <sub>47</sub> O <sub>2</sub> <sup>+</sup>    | 421, 411, 381, 287, 233, 215 189            | Olean-en-dione                         | Triterpene     | -  | -  | -  | -  | +  |
| 94       | 22.93                 | 391.2834 [M+H] <sup>+</sup> | 2.367       | C <sub>24</sub> H <sub>39</sub> O <sub>4</sub> <sup>+</sup>    | 279, 167, 149                               | Bis (ethyl hexyl) phthalate            | Phthalate      | -  | -  | +  | +  | +  |
| 95       | 23.4                  | 338.3421 [M+H] <sup>+</sup> | 0.65        | C <sub>22</sub> H <sub>44</sub> NO <sup>+</sup>                | 321, 303                                    | Docosenamide                           | Amide          | +  | +  | +  | +  | -  |
| 96       | 23.85                 | 483.3839[M+H] <sup>+</sup>  | 1.32        | C <sub>32</sub> H <sub>51</sub> O <sub>3</sub> <sup>+</sup>    | 465, 437, 423, 405, 345, 287, 277, 233, 215 | Oxo-olean-en-yl acetate                | Triterpene     | -  | -  | -  | -  | +  |
| 97       | 25.67                 | 411.3613 [M+H] <sup>+</sup> | 3.381       | C <sub>29</sub> H <sub>47</sub> O <sup>+</sup>                 | 393, 253, 157                               | Stigmasta-trien-ol                     | Sterol         | -  | -  | -  | +  | +  |
| 98       | 25.91                 | 425.3775 [M+H] <sup>+</sup> | 0.688       | C <sub>30</sub> H <sub>49</sub> O <sup>+</sup>                 | 407, 367, 299, 245                          | Eupha-dien-one                         | Triterpene     | -  | -  | -  | -  | +  |
| 99       | 26.47                 | 411.3618 [M+H] <sup>+</sup> | 0.857       | C <sub>29</sub> H <sub>47</sub> O <sup>+</sup>                 | 393, 353, 275, 253                          | Secostigmasta-tetraen-ol               | Sterol         | -  | -  | -  | +  | +  |

| Peak No. | R <sub>t</sub> (min.) | Mol. ion <i>m/z</i> [-/+]   | Error (ppm) | Formula                                        | MS/MS fragments | Tentative Identification        | Class  | TE | BU | EA | CH | PE |
|----------|-----------------------|-----------------------------|-------------|------------------------------------------------|-----------------|---------------------------------|--------|----|----|----|----|----|
| 100      | 26.96                 | 413.3776 [M+H] <sup>+</sup> | 0.418       | C <sub>29</sub> H <sub>49</sub> O <sup>+</sup> | 395, 367, 255   | Stigmasta-dienol (stigmasterol) | Sterol | -  | -  | -  | -  | +  |

R<sub>t</sub>: retention time

TE: Total ethanol extract; BU: Butanol fraction; EA: Ethyl acetate fraction; CH: Chloroform fraction; PE: Petroleum ether fraction

+ and - denotes the presence or absence of a metabolite in the extract or fractions

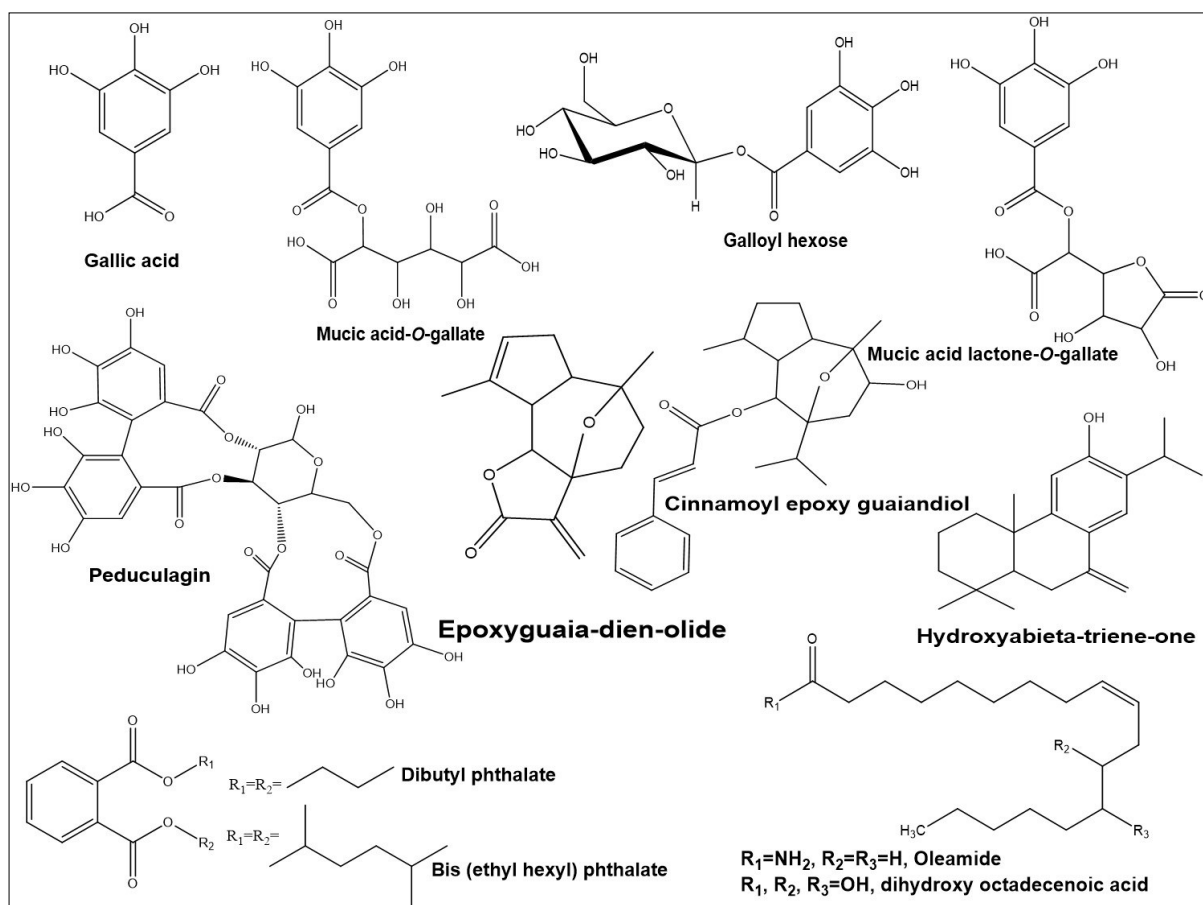

**Fig. S6:** Structures of the major metabolites identified in *P. emblica* fruit via UPLC-MS and discussed in the manuscript

**Table S4:** Metabolites analyzed via GC-MS from PE and CH fractions of *P. emblica* fruits with results expressed as relative percentile of the total peak area

| Peak                           | RT<br>(min) | KI     | Name                                                                        | Class         | PE          | CH           |
|--------------------------------|-------------|--------|-----------------------------------------------------------------------------|---------------|-------------|--------------|
| <b>Organic acids</b>           |             |        |                                                                             |               |             |              |
| 1                              | 6.55        | 862.1  | Lactic acid, bis-TMS                                                        | Organic acid  | 0.09        | 0.18         |
| 2                              | 6.86        | 877.2  | Glycolic acid, bis-TMS                                                      | Organic acid  | -           | 0.18         |
| 3                              | 7.10        | 888.3  | Pyruvic acid, enol, di-TMS                                                  | Organic acid  | -           | 0.16         |
| 4                              | 8.28        | 1938.3 | 2-Furoic acid-TMS                                                           | Organic acid  | 0.07        | 0.14         |
| 5                              | 11.23       | 1056.2 | Malic acid, <i>O</i> -trimethylsilyl-, dimethyl ester                       | Organic acid  | -           | 0.13         |
| 6                              | 12.45       | 1103.9 | Maleic acid, di-TMS                                                         | Organic acid  | 0.06        | 0.11         |
| 7                              | 12.75       | 1115.5 | Succinic acid, di-TMS                                                       | Organic acid  | 0.33        | 0.9          |
| 8                              | 13.69       | 1151.9 | Fumaric acid, bis-TMS                                                       | Organic acid  | 0.06        | 0.11         |
| 9                              | 16.09       | 1229.1 | Malic acid -3TMS                                                            | Organic acid  | 0.13        | 10.75        |
| 10                             | 19.22       | 1375.9 | $\alpha$ -Hydroxyglutaric acid (3TMS)                                       | Organic acid  | -           | 0.11         |
| 11                             | 19.23       | 1376.2 | Suberic acid-2TMS                                                           | Organic acid  | 0.08        | -            |
| 12                             | 20.64       | 1437   | Tartaric acid, bis- <i>O</i> -(trimethylsilyl)-, bis(trimethylsilyl) ester  | Organic acid  | 0.11        | -            |
| 13                             | 24.17       | 1596.7 | Azelaic acid, bis-TMS                                                       | Organic acid  | 0.46        | 0.19         |
| 14                             | 24.59       | 1617   | Citric acid, tetrakis-TMS                                                   | Organic acid  | 0.18        | 0.21         |
| 15                             | 27.14       | 1742.7 | Ascorbic acid (4TMS)                                                        | Organic acid  | -           | 0.25         |
| <b>Total organic acids (%)</b> |             |        |                                                                             |               | <b>1.59</b> | <b>13.42</b> |
| <b>Sugars</b>                  |             |        |                                                                             |               |             |              |
| 16                             | 8.01        | 927.4  | Ethylene glycol, bis-trimethylsilyl ether                                   | Sugar alcohol | 1.88        | 2.29         |
| 17                             | 11.68       | 1074   | Glycerol, tris-TMS ether                                                    | Sugar alcohol | 0.33        | 0.36         |
| 18                             | 13.12       | 1129.9 | Glyceric acid-3TMS                                                          | Sugar acid    | 0.17        | 0.33         |
| 19                             | 18.85       | 1360.2 | L-Threonic acid, tris(trimethylsilyl) ether, trimethylsilyl ester           | Sugar acid    | 0.34        | 0.28         |
| 20                             | 22.78       | 1532.8 | D-Xylonic acid, 2,3,5-tris- <i>O</i> -(trimethylsilyl)-, $\gamma$ -lactone, | Sugar acid    | 0.11        | 0.15         |
| 21                             | 24.26       | 1601.1 | D-Fructofuranose, pentakis(trimethylsilyl) ether (isomer 1)                 | Sugar         | 1.77        | 1.03         |
| 22                             | 24.47       | 1611.1 | D-Fructofuranose, pentakis(trimethylsilyl) ether (isomer 2)                 | Sugar         | 5.52        | 2.74         |
| 23                             | 26.07       | 1689   | D-Galactopyranose, 1,2,3,4,6-pentakis- <i>O</i> -(trimethylsilyl)-,         | Sugar         | 0.23        | -            |
| 24                             | 26.41       | 1705.7 | Gluconic acid, 2,3,5,6-tetrakis- <i>O</i> -(trimethylsilyl)-, lactone       | Sugar acid    | 0.84        | 1.25         |
| 25                             | 27.33       | 1752.5 | Unknown sugar                                                               | Sugar         | 0.96        | -            |
| 26                             | 27.85       | 1778.6 | D-Glucose, penta-TMS                                                        | Sugar         | 0.31        | 0.24         |
| 27                             | 28.21       | 1796.9 | $\beta$ -Galactofuranose, pentakis-TMS                                      | Sugar         | 1.57        | 0.43         |
| 28                             | 29.06       | 1840.5 | Maltose, octakis(trimethylsilyl) ether, (isomer 1)                          | Sugar         | 4.19        | 3.6          |
| 29                             | 29.86       | 1881.3 | Myo-Inositol, 1,2,3,4,5,6-hexakis- <i>O</i> -(trimethylsilyl)               | Sugar         | 1.1         | 1.06         |



|                                        |       |        |                                                                    |                   |              |              |
|----------------------------------------|-------|--------|--------------------------------------------------------------------|-------------------|--------------|--------------|
| 30                                     | 38.96 | 2344.1 | Sucrose, octakis (trimethylsilyl) ether                            | Sugar             | 0.32         | 0.2          |
| <b>Total sugars (%)</b>                |       |        |                                                                    |                   | <b>19.65</b> | <b>13.98</b> |
| <b>Phenolic compounds</b>              |       |        |                                                                    |                   |              |              |
| 31                                     | 11.05 | 1049.1 | Benzoic acid trimethylsilyl ester                                  | Phenolic compound | 0.06         | 0.11         |
| 32                                     | 18.62 | 1350.4 | (E)- Cinnamic acid, TMS                                            | Phenolic compound | 5.13         | 3.98         |
| 33                                     | 20.40 | 1426.5 | <i>p</i> -Hydroxybenzoic acid -TMS                                 | Phenolic compound | 0.05         | –            |
| 34                                     | 24.94 | 1633.8 | Butanoic acid, 2-methyl-, 2-methoxy-4-(2-propenyl) phenyl ester    | Phenolic compound | 0.75         | –            |
| 35                                     | 25.96 | 1683.3 | Unknown phenolic                                                   | Phenolic compound | 0.42         | 7.51         |
| 36                                     | 26.95 | 1733.2 | 3,4,5-Trihydroxybenzoic acid methyl ester, tris(O-trimethylsilyl)- | Phenolic compound | –            | 0.6          |
| 37                                     | 27.41 | 1756.1 | Gallic acid, tetraTMS                                              | Phenolic compound | 2.89         | 7.31         |
| 38                                     | 29.95 | 1885.8 | Ferulic acid, di-TMS                                               | Phenolic compound | –            | 0.16         |
| 39                                     | 42.17 | 2507.1 | Catechin, penta-TMS ether                                          | Phenolic compound | 0.16         | –            |
| <b>Total Phenolic compounds (%)</b>    |       |        |                                                                    |                   | <b>9.46</b>  | <b>19.67</b> |
| <b>Phthalides and phthalates</b>       |       |        |                                                                    |                   |              |              |
| 40                                     | 21.15 | 1459.4 | Butylphthalide                                                     | Phthalide         | 6.26         | –            |
| 41                                     | 22.57 | 1523.2 | Senkyunolide (N-butyl-4,5-dihydrophthalide)                        | Phthalide         | 4.15         | –            |
| 42                                     | 37.48 | 2268.7 | Bis (2-ethylhexyl) phthalate                                       | Phthalate         | 3.5          | 3.95         |
| <b>Total phthalides and phthalates</b> |       |        |                                                                    |                   | <b>13.91</b> | <b>3.95</b>  |
| <b>Fatty acids and esters</b>          |       |        |                                                                    |                   |              |              |
| 43                                     | 13.95 | 1161.9 | Nonanoic acid-TMS                                                  | Fatty acid        | 0.08         | -            |
| 44                                     | 16.38 | 1258.3 | Decanoic acid-TMS                                                  | Fatty acid        | 0.08         | -            |
| 45                                     | 18.74 | 1355.3 | Undecanoic acid-TMS                                                | Fatty acid        | 0.09         | -            |
| 46                                     | 21.01 | 1453.3 | Lauric acid-TMS                                                    | Fatty acid        | 0.41         | -            |
| 47                                     | 25.26 | 1649.4 | Myristic acid-TMS                                                  | Fatty acid        | 0.73         | 0.15         |
| 48                                     | 26.86 | 1728.2 | Palmitic acid, methyl ester                                        | Fatty acid ester  | 6.28         | -            |
| 49                                     | 28.74 | 1824.1 | (Z)-9-Hexadecenoic acid-TMS                                        | Fatty acid        | 0.32         | -            |
| 50                                     | 28.80 | 1827.1 | Margaric acid, methyl ester                                        | Fatty acid ester  | 0.2          | -            |
| 51                                     | 29.23 | 1849.2 | Palmitic acid-TMS                                                  | Fatty acid        | 5.97         | 2.99         |
| 52                                     | 30.06 | 1891.2 | Linolelaidic acid, methyl ester                                    | Fatty acid ester  | –            | 0.09         |
| 53                                     | 30.09 | 1892.5 | Linoleic acid, methyl ester                                        | Fatty acid ester  | 2.27         | -            |
| 54                                     | 30.22 | 1899.4 | Elaidic acid, methyl ester                                         | Fatty acid ester  | 1.01         | -            |
| 55                                     | 30.42 | 1911   | Oleic acid, methyl ester                                           | Fatty acid ester  | 0.69         | -            |
| 56                                     | 30.69 | 1923   | Stearic acid, methyl ester                                         | Fatty acid ester  | 1.02         | -            |
| 57                                     | 30.99 | 1938.5 | Margaric acid-TMS                                                  | Fatty acid        | 1.02         | -            |
| 58                                     | 31.41 | 1959.9 | Unknown fatty acid                                                 | Fatty acid        | 0.66         | -            |

|                                         |       |        |                                                             |                  |              |             |
|-----------------------------------------|-------|--------|-------------------------------------------------------------|------------------|--------------|-------------|
| 59                                      | 32.21 | 2000.7 | Linoleic acid -TMS                                          | Fatty acid       | 2.85         | 0.99        |
| 60                                      | 32.36 | 2008   | Elaidic acid -TMS                                           | Fatty acid       | 3.69         | 1.44        |
| 61                                      | 32.42 | 2011.1 | Oleic acid-TMS                                              | Fatty acid       | 0.73         | 0.22        |
| 62                                      | 32.77 | 2029   | Stearic acid-TMS                                            | Fatty acid       | 3.89         | 0.63        |
| 63                                      | 34.21 | 2102.1 | Arachidic acid, methyl ester                                | Fatty acid ester | 0.11         | -           |
| 64                                      | 36.04 | 2195.3 | Arachidic acid-TMS                                          | Fatty acid       | 0.53         | -           |
| 65                                      | 37.60 | 2274.8 | Heneicosanoic acid-TMS                                      | Fatty acid       | 0.22         | -           |
| 66                                      | 38.72 | 2331.9 | (Z)-13-Docosenoic acid-TMS                                  | Fatty acid       | 0.19         | -           |
| 67                                      | 39.11 | 2351.5 | Behenic acid-TMS                                            | Fatty acid       | 0.39         | 0.16        |
| 68                                      | 41.97 | 2496.9 | lignoceric acid-TMS                                         | Fatty acid       | 0.23         | -           |
| 69                                      | 42.92 | 2545.4 | $\alpha$ -Hydroxylignoceric acid, TMS ether, methyl ester   | Fatty acid ester | 0.15         | -           |
| 70                                      | 43.33 | 2566   | Pentacosanoic acid-TMS                                      | Fatty acid       | 0.13         | -           |
| 71                                      | 44.64 | 2632.8 | Hexacosanoic acid-TMS                                       | Fatty acid       | 0.13         | -           |
| <b>Total fatty acids and esters (%)</b> |       |        |                                                             |                  | <b>34.07</b> | <b>6.86</b> |
| <b>Fatty alcohols</b>                   |       |        |                                                             |                  |              |             |
| 72                                      | 32.64 | 2022.4 | Unknown fatty alcohol                                       | Fatty alcohol    | 1.63         | -           |
| 73                                      | 43.81 | 2590.8 | Tetracosan-1-ol trimethylsilyl ether                        | Fatty alcohol    | 0.23         | -           |
| <b>Total fatty alcohols (%)</b>         |       |        |                                                             |                  | <b>1.86</b>  | <b>-</b>    |
| <b>Monoglycerides</b>                   |       |        |                                                             |                  |              |             |
| 74                                      | 37.81 | 2285.4 | 2-Monopalmitoyl glycerol trimethylsilyl ether               | Monoglyceride    | 0.18         | -           |
| 75                                      | 38.32 | 2311.1 | 1-Monopalmitin trimethylsilyl ether                         | Monoglyceride    | 1.03         | 0.34        |
| 76                                      | 40.80 | 2437.6 | 1-Monooleoylglycerol trimethylsilyl ether                   | Monoglyceride    | 0.39         | -           |
| 77                                      | 41.15 | 2455.4 | Bis (trimethylsilyl) monostearin                            | Monoglyceride    | 0.3          | -           |
| <b>Total monoglycerides (%)</b>         |       |        |                                                             |                  | <b>1.9</b>   | <b>0.34</b> |
| <b>Terpenes and sterols</b>             |       |        |                                                             |                  |              |             |
| 78                                      | 22.70 | 1528.9 | Isosericenin                                                | Sesquiterpene    | 1.24         | -           |
| 79                                      | 22.99 | 1542.5 | $\beta$ -Eudesmol, trimethylsilyl ether                     | Sesquiterpene    | 0.88         | -           |
| 80                                      | 34.03 | 2093.3 | Pimaric acid -TMS                                           | Diterpene        | 0.53         | -           |
| 81                                      | 34.34 | 2108.7 | Isopimaric acid-TMS                                         | Diterpene        | 0.24         | -           |
| 82                                      | 33.40 | 2061.1 | Unknown sterol                                              | Sterol           | 1.82         | -           |
| 83                                      | 43.38 | 2568.7 | Unknown sterol-TMS                                          | Sterol           | 0.6          | 0.31        |
| 84                                      | 47.38 | 2772.1 | Campesterol-TMS                                             | Sterol           | 0.11         | -           |
| 85                                      | 47.75 | 2791.2 | Stigmasterol trimethylsilyl ether                           | Sterol           | 0.34         | -           |
| 86                                      | 48.77 | 2843.1 | $\beta$ -Sitosterol trimethylsilyl ether                    | Sterol           | 1.66         | 0.23        |
| 87                                      | 48.95 | 2851.8 | 3-[(Trimethylsilyl) oxy] stigmasta-5,24(28)-diene           | Sterol           | 0.10         | -           |
| 88                                      | 49.30 | 2869.7 | (3 $\beta$ )- Cholest-5-en-24-one, 3-[(trimethylsilyl) oxy] | Sterol           | 0.09         | -           |
| 89                                      | 54.59 | 3139   | Unknown sterol                                              | Sterol           | 0.07         | -           |
| 90                                      | 46.47 | 2725.7 | Unknown terpene                                             | Triterpene       | 0.12         | -           |
| 91                                      | 47.10 | 2757.8 | Unknown oleanane triterpenes                                | Triterpene       | 0.28         | 0.19        |
| 92                                      | 48.72 | 2840.1 | Olean-12-en-3-one                                           | Triterpene       | 1.43         | -           |

|                                       |       |        |                                                                       |                |              |              |
|---------------------------------------|-------|--------|-----------------------------------------------------------------------|----------------|--------------|--------------|
| 93                                    | 49.09 | 2859   | Unknown oleanane triterpenes                                          | Triterpene     | 0.27         | -            |
| 94                                    | 49.93 | 2901.8 | $\alpha$ -Amyrin, trimethylsilyl ether                                | Triterpene     | 0.21         | -            |
| 95                                    | 50.49 | 2930.3 | $\beta$ -Amyrin trimethylsilyl ether                                  | Triterpene     | 0.08         | -            |
| 96                                    | 50.78 | 2944.9 | (3 $\alpha$ )-12-Oleanen-3-yl acetate                                 | Triterpene     | 0.1          | -            |
| 97                                    | 53.04 | 3060.1 | Unknown triterpenes                                                   | Triterpene     | 0.3          | -            |
| 98                                    | 53.89 | 3103.5 | Lup-20(29)-en-3 $\beta$ -ol, acetate                                  | Triterpene     | 0.13         | -            |
| 99                                    | 54.26 | 3121.9 | Unknown triterpene                                                    | Triterpene     | 0.25         | 0.11         |
| 100                                   | 54.91 | 3155.1 | Unknown triterpenes                                                   | Triterpene     | 0.07         | -            |
| <b>Total terpenes and sterols (%)</b> |       |        |                                                                       |                | <b>10.93</b> | <b>0.84</b>  |
| <b>Miscellaneous</b>                  |       |        |                                                                       |                |              |              |
| 101                                   | 7.191 | 892.9  | Ethanolamine, N-trimethylsilyl-, trimethylsilyl ether                 | Amine          | 0.64         | 2.12         |
| 102                                   | 13.42 | 1141.5 | Ethanolamine, N, N-bis (trimethylsilyl)-, trimethylsilyl ether        | Amine          | -            | 0.25         |
| 103                                   | 11.62 | 1071.4 | Phosphoric acid, triTMS                                               | Inorganic acid | 0.37         | 0.71         |
| 104                                   | 17.85 | 1318.1 | Pyroglutamic acid, bis (trimethylsilyl)                               | Amino acid     | 0.21         | 15.13        |
| 105                                   | 17.52 | 1304.3 | Pentonic acid, 2-deoxy-3,5-bis-O-(trimethylsilyl)-, $\gamma$ -lactone | Lactone        | 0.21         | -            |
| 106                                   | 20.53 | 1432.2 | 2,3,4,5-Tetrahydropentanoic acid-1,4-lactone, tris(trimethylsilyl)    | Lactone        | 0.28         | -            |
| 107                                   | 31.91 | 1985.5 | 1-Docosene                                                            | Hydrocarbon    | 0.28         | -            |
| <b>Total Miscellaneous (%)</b>        |       |        |                                                                       |                | <b>2.0</b>   | <b>18.22</b> |
| <b>Unknowns</b>                       |       |        |                                                                       |                |              |              |
| 108                                   | 5.7   | 821.4  | Unknown                                                               | Unknown        | 0.25         | 0.36         |
| 109                                   | 12.10 | 1090.4 | Unknown                                                               | Unknown        | -            | 0.30         |
| 110                                   | 14.12 | 1168.5 | Unknown                                                               | Unknown        | -            | 15.2         |
| 111                                   | 14.61 | 1187.8 | Unknown                                                               | Unknown        | -            | 2.97         |
| 112                                   | 16.63 | 1268.4 | Unknown                                                               | Unknown        | -            | 2.09         |
| 113                                   | 18.18 | 1331.9 | Unknown                                                               | Unknown        | 0.4          | 0.31         |
| 114                                   | 22.92 | 1539.4 | Unknown                                                               | Unknown        | 0.83         | 1.02         |
| 115                                   | 26.89 | 1730.1 | Unknown                                                               | Unknown        | -            | 0.47         |
| 116                                   | 28.67 | 1820.7 | Unknown                                                               | Unknown        | -            | -            |
| 117                                   | 30.57 | 1917.3 | Unknown                                                               | Unknown        | 0.36         | -            |
| 118                                   | 41.62 | 2479.2 | Unknown                                                               | Unknown        | 0.39         | -            |
| 119                                   | 53.64 | 3090.7 | Unknown                                                               | Unknown        | 0.19         | -            |
| <b>Total Unknowns (%)</b>             |       |        |                                                                       |                | <b>4.62</b>  | <b>22.72</b> |
| <b>Total metabolites (%)</b>          |       |        |                                                                       |                | <b>99.99</b> | <b>100</b>   |

KI: Kovats retention index.; RT: Retention time.

-: absent

PE: Petroleum ether fraction; CH: Chloroform fraction; TMS: Trimethylsilyl

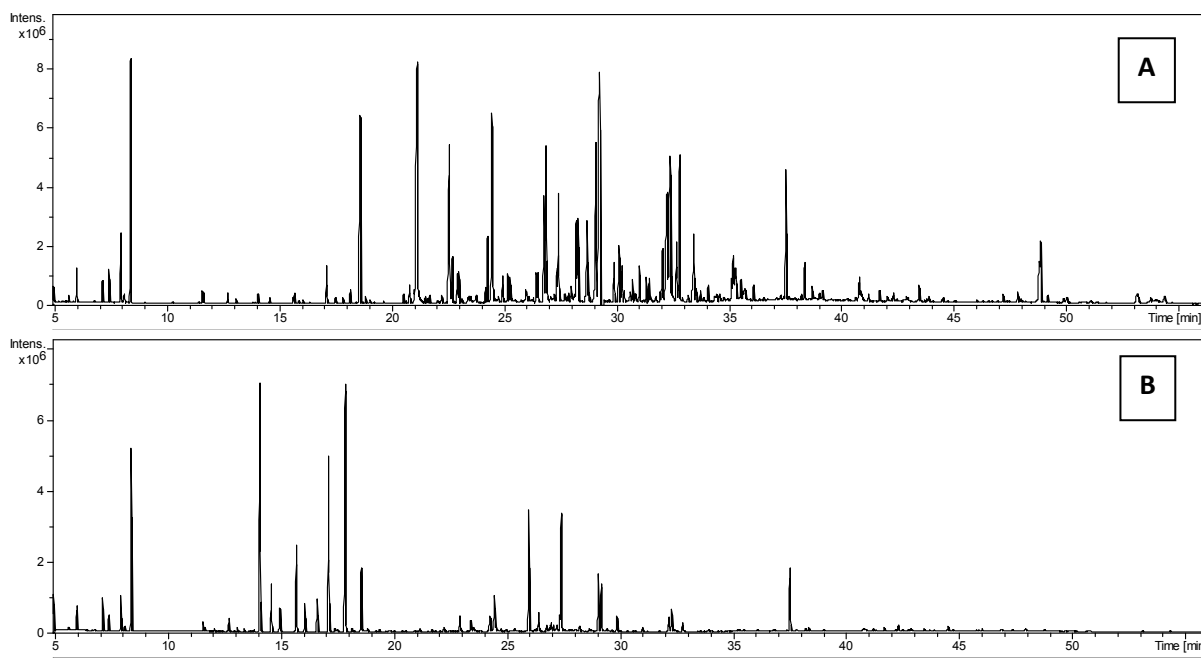

**Fig. S7:** Representative GC/MS chromatogram analysis of silylated metabolites in: **(A):** PE fraction; **(B):** CH fraction of *P. emblica* fruit.
